# Supplementary material
Source: publisher site journal article supplement (https://www.dovepress.com/article/435701)
Supplement: Supplementary file 1 [file get_supplementary_file.php]

**
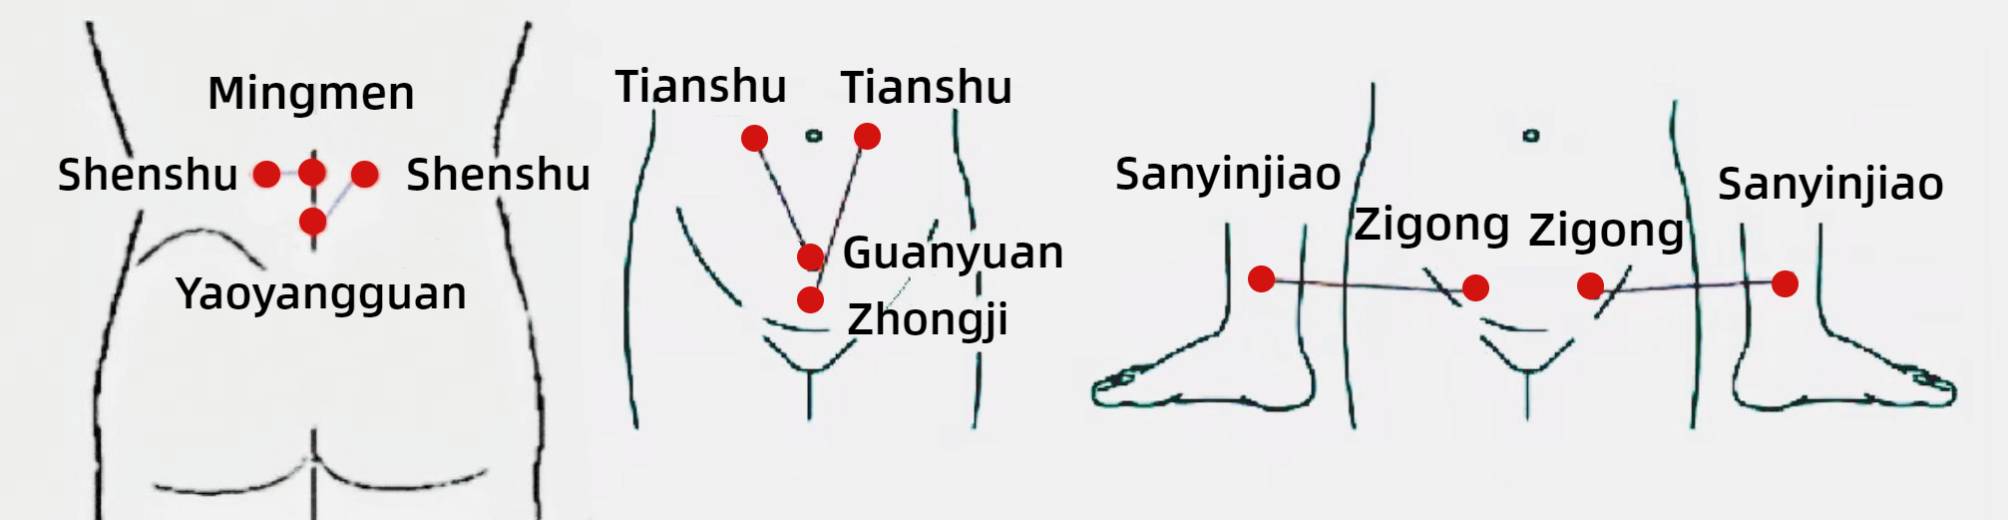
**

**Figure S1.** The acupuncture points stimulated in this study: Guanyuan (RN4), Zhongji (RN3), bilateral Sanyinjiao (SP6), bilateral Zigong (EX-CA1), bilateral Tianshu (ST25), bilateral Shenshu (BL23), Yaoyangguan (DU3), and Mingmen (DU4).
